# Supplementary material for: Incidence and Predictors of Major Adverse Cardiovascular Events in Patients With Established Atherosclerotic Disease or Multiple Risk Factors
Source: PubMed Central journal article supplement — J Am Heart Assoc. 2020 Jan 15;9(2):e014402. doi: 10.1161/JAHA.119.014402 (PMC7033849; doi:10.1161/jaha.119.014402), 2020-01-15
Supplement: JAH3-9-e014402-s001.pdf [file JAH3-9-e014402-s001.pdf]

# **SUPPLEMENTAL MATERIAL**

**Table S1. List of Baseline and Outcome Variable Codes\*.**

| Variable                           | Code(s)                                                                                                                                                                                                                                                                                                                                                                                                                                                                                                                                                                                                                                                                                                                                                                                                                                                                                                                                                                                                                                                                                                                                                                                                                                                                                                                                                                                                                                                                                                                                                              | Code Description |
|------------------------------------|----------------------------------------------------------------------------------------------------------------------------------------------------------------------------------------------------------------------------------------------------------------------------------------------------------------------------------------------------------------------------------------------------------------------------------------------------------------------------------------------------------------------------------------------------------------------------------------------------------------------------------------------------------------------------------------------------------------------------------------------------------------------------------------------------------------------------------------------------------------------------------------------------------------------------------------------------------------------------------------------------------------------------------------------------------------------------------------------------------------------------------------------------------------------------------------------------------------------------------------------------------------------------------------------------------------------------------------------------------------------------------------------------------------------------------------------------------------------------------------------------------------------------------------------------------------------|------------------|
| Coronary artery disease            |                                                                                                                                                                                                                                                                                                                                                                                                                                                                                                                                                                                                                                                                                                                                                                                                                                                                                                                                                                                                                                                                                                                                                                                                                                                                                                                                                                                                                                                                                                                                                                      |                  |
| Stable or unstable angina          | I200, I2109, I2111, I2119, I2129, I213, I214, I240                                                                                                                                                                                                                                                                                                                                                                                                                                                                                                                                                                                                                                                                                                                                                                                                                                                                                                                                                                                                                                                                                                                                                                                                                                                                                                                                                                                                                                                                                                                   | ICD-10 Diagnosis |
| Percutaneous coronary intervention | Z98.61, Z95.5                                                                                                                                                                                                                                                                                                                                                                                                                                                                                                                                                                                                                                                                                                                                                                                                                                                                                                                                                                                                                                                                                                                                                                                                                                                                                                                                                                                                                                                                                                                                                        | ICD-10 Diagnosis |
|                                    | 92920, 92921, 92924, 92925, 92928, 92929, 92933, 92934, 92937, 92938, 92941, 92943, 92944, 02700D6, 02700DZ, 02700T6, 02700TZ, 02700Z6, 02700ZZ, 02703D6, 02703DZ, 02703T6, 02703TZ, 02703Z6, 02703ZZ, 02704D6, 02704DZ, 02704T6, 02704TZ, 02704Z6, 02704ZZ, 02710D6, 02710DZ, 02710T6, 02710TZ, 02710Z6, 02710ZZ, 02713D6, 02713DZ, 02713T6, 02713TZ, 02713Z6, 02713ZZ, 02714D6, 02714DZ, 02714T6, 02714TZ, 02714Z6, 02714ZZ, 02720D6, 02720DZ, 02720T6, 02720TZ, 02720Z6, 02720ZZ, 02723D6, 02723DZ, 02723T6, 02723TZ, 02723Z6, 02723ZZ, 02724D6, 02724DZ, 02724T6, 02724TZ, 02724Z6, 02724ZZ, 02730D6, 02730DZ, 02730T6, 02730TZ, 02730Z6, 02730ZZ, 02733D6, 02733DZ, 02733T6, 02733TZ, 02733Z6, 02733ZZ, 02734D6, 02734DZ, 02734T6, 02734TZ, 02734Z6, 02734ZZ, C9600, C9601, C9602, C9603, C9604, C9605, C9606, C9607, C9608, 0270046, 027004Z, 0270346, 027034Z, 0270446, 027044Z, 0271046, 027104Z, 0271346, 027134Z, 0271446, 027144Z, 0272046, 027204Z, 0272346, 027234Z, 0272446, 027244Z, 0273046, 027304Z, 0273346, 027334Z, 0273446, 027344Z                                                                                                                                                                                                                                                                                                                                                                                                                                                                                                             | CPT-4 Procedure  |
| Coronary artery bypass graft       | 566, 567, 33510, 33511, 33512, 33513, 33514, 33516, 33517, 33518, 33519, 33520, 33521, 33522, 33523, 33525, 33528, 33530, 33533, 33534, 33535, 33536, 35600, 4110F, 75762, 75764, 75766, 75767, 93551, C9604, C9605, G8158, G8159, G8160, G8161, G8162, G8163, G8164, G8165, G8166, G8167, G8170, G8171, G8172, G8497, G8544, G8573, G8574, I2570, I25700, I25701, I25708, I25709, I2571, I25710, I25711, I25718, I25719, I2572, I25720, I25721, I25728, I25729, I2573, I25730, I25731, I25738, I25739, I2579, I25790, I25791, I25798, I25799, I25810, T82211, T82211A, T82211D, T82211S, T82212, T82212A, T82212D, T82212S, T82213, T82213A, T82213D, T82213S, T82218, T82218A, T82218D, T82218S, Z951, 0210093, 0210098, 0210099, 021009C, 021009F, 021009W, 02100A3, 02100A8, 02100A9, 02100AC, 02100AF, 02100AW, 02100J3, 02100J8, 02100J9, 02100JC, 02100JF, 02100JW, 02100K3, 02100K8, 02100K9, 02100KC, 02100KF, 02100KW, 02100Z3, 02100Z8, 02100Z9, 02100ZC, 02100ZF, 0210344, 02103D4, 0210444, 0210493, 0210499, 0210499, 021049F, 021049W, 02104A3, 02104A8, 02104A9, 02104AC, 02104AF, 02104AW, 02104D4, 02104J3, 02104J8, 02104J9, 02104JC, 02104JF, 02104JW, 02104K3, 02104K8, 02104K9, 02104KC, 02104KF, 02104KW, 02104Z3, 02104Z8, 02104Z9, 02104ZC, 02104ZF, 0211093, 0211098, 0211099, 021109C, 021109F, 021109W, 02110A3, 02110A8, 02110A9, 02110AC, 02110AF, 02110AW, 02110J3, 02110J8, 02110J9, 02110JC, 02110JF, 02110JW, 02110K3, 02110K8, 02110K9, 02110KC, 02110KF, 02110KW, 02110Z3, 02110Z8, 02110Z9, 02110ZC, 02110ZF, 0211344, 02113D4, | CPT-4 Procedure  |

|                                      |                                                                                                                                                                                                                                                                                                                                                                                                                                                                                                                                                                                                                                                                                                                                                                                                                                                                                                                                                                                                                                                                                                                                                                                                                                                                                                                                                                                                                                                                                                                                                                                                                                                                                                                               |                  |
|--------------------------------------|-------------------------------------------------------------------------------------------------------------------------------------------------------------------------------------------------------------------------------------------------------------------------------------------------------------------------------------------------------------------------------------------------------------------------------------------------------------------------------------------------------------------------------------------------------------------------------------------------------------------------------------------------------------------------------------------------------------------------------------------------------------------------------------------------------------------------------------------------------------------------------------------------------------------------------------------------------------------------------------------------------------------------------------------------------------------------------------------------------------------------------------------------------------------------------------------------------------------------------------------------------------------------------------------------------------------------------------------------------------------------------------------------------------------------------------------------------------------------------------------------------------------------------------------------------------------------------------------------------------------------------------------------------------------------------------------------------------------------------|------------------|
|                                      | 211444, 0211493, 0211498, 0211499, 021149C, 021149F, 021149W, 02114A3, 02114A8, 02114A9, 02114AC, 02114AF, 02114AW, 02114D4, 02114J3, 02114J8, 02114J9, 02114JC, 02114JF, 02114JW, 02114K3, 02114K8, 02114K9, 02114KC, 02114KF, 02114KW, 02114Z3, 02114Z8, 02114Z9, 02114ZC, 02114ZF, 0212093, 0212098, 0212099, 021209C, 021209F, 021209W, 02120A3, 02120A8, 02120A9, 02120AC, 02120AF, 02120AW, 02120J3, 02120J8, 02120J9, 02120JC, 02120JF, 02120JW, 02120K3, 02120K8, 02120K9, 02120KC, 02120KF, 02120KW, 02120Z3, 02120Z8, 02120Z9, 02120ZC, 02120ZF, 0212344, 02123D4, 0212444, 0212493, 0212498, 0212499, 021249C, 021249F, 021249W, 02124A3, 02124A8, 02124A9, 02124AC, 02124AF, 02124AW, 02124D4, 02124J3, 02124J8, 02124J9, 02124JC, 02124JF, 02124JW, 02124K3, 02124K8, 02124K9, 02124KC, 02124KF, 02124KW, 02124Z3, 02124Z8, 02124Z9, 02124ZC, 02124ZF, 0213093, 0213098, 0213099, 021309C, 021309F, 021309W, 02130A3, 02130A8, 02130A9, 02130AC, 02130AF, 02130AW, 02130J3, 02130J8, 02130J9, 02130JC, 02130JF, 02130JW, 02130K3, 02130K8, 02130K9, 02130KC, 02130KF, 02130KW, 02130Z3, 02130Z8, 02130Z9, 02130ZC, 02130ZF, 213344, 02133D4, 0213444, 0213493, 0213498, 0213499, 021349C, 021349F, 021349W, 02134A3, 02134A8, 02134A9, 02134AC, 02134AF, 02134AW, 02134D4, 02134J3, 02134J8, 02134J9, 02134JC, 02134JF, 02134JW, 02134K3, 02134K8, 02134K9, 02134KC, 02134KF, 02134KW, 02134Z3, 02134Z8, 02134Z9, 02134ZC, 02134ZF, 0210498, B2020ZZ, B2021ZZ, B202YZZ, B2030ZZ, B2031ZZ, B203YZZ, B212010, B2120ZZ, B212110, B2121ZZ, B212Y10, B212YZZ, B213010, B2130ZZ, B213110, B2131ZZ, B213Y10, B213YZZ, B22300Z, B2230ZZ, B22310Z, B2231ZZ, B223YoZ, B223YZZ, B223Z2Z, B223ZZZ, B233YoZ, B233YZZ, B233ZZZ |                  |
| Myocardial infarction                | I21, I21.0, I21.01, I21.02, I21.09, I21.1, I21.11, I21.19, I21.2, I21.21, I21.29, I21.3, I21.4, I22, I22.0, I22.1, I22.2, I22.8, I22.9, I23, I23.0, I23.1, I23.2, I23.3, I23.4, I23.5, I23.6, I23.7, I23.8, I25.2                                                                                                                                                                                                                                                                                                                                                                                                                                                                                                                                                                                                                                                                                                                                                                                                                                                                                                                                                                                                                                                                                                                                                                                                                                                                                                                                                                                                                                                                                                             | ICD-10 Diagnosis |
| Cerebrovascular disease              |                                                                                                                                                                                                                                                                                                                                                                                                                                                                                                                                                                                                                                                                                                                                                                                                                                                                                                                                                                                                                                                                                                                                                                                                                                                                                                                                                                                                                                                                                                                                                                                                                                                                                                                               |                  |
| Ischemic stroke                      | I63                                                                                                                                                                                                                                                                                                                                                                                                                                                                                                                                                                                                                                                                                                                                                                                                                                                                                                                                                                                                                                                                                                                                                                                                                                                                                                                                                                                                                                                                                                                                                                                                                                                                                                                           | ICD-10 Diagnosis |
| Transient ischemic attack            | G45.0, G45.1, G45.2, G45.4, G45.8, G45.9                                                                                                                                                                                                                                                                                                                                                                                                                                                                                                                                                                                                                                                                                                                                                                                                                                                                                                                                                                                                                                                                                                                                                                                                                                                                                                                                                                                                                                                                                                                                                                                                                                                                                      | ICD-10 Diagnosis |
| Peripheral artery disease            |                                                                                                                                                                                                                                                                                                                                                                                                                                                                                                                                                                                                                                                                                                                                                                                                                                                                                                                                                                                                                                                                                                                                                                                                                                                                                                                                                                                                                                                                                                                                                                                                                                                                                                                               |                  |
| History of peripheral artery disease | I70201, I70202, I70203, I70208, I70209, I70211, I70212, I70213, I70218, I70219, I70221, I70222, I70223, I70228, I70229, I70231, I70231, I70232, I70232, I70233, I70233, I70234, I70234, I70235, I70235, I70238, I70238, I70239, I70239, I70241, I70241, I70242, I70242, I70243, I70243, I70244, I70244, I70245, I70245, I70248, I70248, I70249, I70249, I7025, I7025, I70261, I70262, I70263, I70268, I70269, I70291, I70292, I70293, I70298, I70299                                                                                                                                                                                                                                                                                                                                                                                                                                                                                                                                                                                                                                                                                                                                                                                                                                                                                                                                                                                                                                                                                                                                                                                                                                                                          | ICD-10 Diagnosis |
| Angioplasty                          | 39.50                                                                                                                                                                                                                                                                                                                                                                                                                                                                                                                                                                                                                                                                                                                                                                                                                                                                                                                                                                                                                                                                                                                                                                                                                                                                                                                                                                                                                                                                                                                                                                                                                                                                                                                         | ICD-9 Procedure† |
| Stenting                             | 00.55, 39.90,                                                                                                                                                                                                                                                                                                                                                                                                                                                                                                                                                                                                                                                                                                                                                                                                                                                                                                                                                                                                                                                                                                                                                                                                                                                                                                                                                                                                                                                                                                                                                                                                                                                                                                                 | ICD-9 Procedure† |
| Atherectomy                          | 17.56                                                                                                                                                                                                                                                                                                                                                                                                                                                                                                                                                                                                                                                                                                                                                                                                                                                                                                                                                                                                                                                                                                                                                                                                                                                                                                                                                                                                                                                                                                                                                                                                                                                                                                                         | ICD-9 Procedure† |

|                                     |                                                                                                                                                                                                                                                                                                                                                                                                                                                                                                                                                                                                                                                                                                                                                                                                                                                                                                                                                                                                                                                                                                                                                                                                                                                                                                                                                                                                                                                                                                                                                                                                                                                                                                                                                                                                                                                                                                                                                                                                                                                                                                                                                                                                                                                                                                                                                                                                                                                        |                  |
|-------------------------------------|--------------------------------------------------------------------------------------------------------------------------------------------------------------------------------------------------------------------------------------------------------------------------------------------------------------------------------------------------------------------------------------------------------------------------------------------------------------------------------------------------------------------------------------------------------------------------------------------------------------------------------------------------------------------------------------------------------------------------------------------------------------------------------------------------------------------------------------------------------------------------------------------------------------------------------------------------------------------------------------------------------------------------------------------------------------------------------------------------------------------------------------------------------------------------------------------------------------------------------------------------------------------------------------------------------------------------------------------------------------------------------------------------------------------------------------------------------------------------------------------------------------------------------------------------------------------------------------------------------------------------------------------------------------------------------------------------------------------------------------------------------------------------------------------------------------------------------------------------------------------------------------------------------------------------------------------------------------------------------------------------------------------------------------------------------------------------------------------------------------------------------------------------------------------------------------------------------------------------------------------------------------------------------------------------------------------------------------------------------------------------------------------------------------------------------------------------------|------------------|
| Peripheral arterial bypass grafting | 39.25, 39.26, 39.29                                                                                                                                                                                                                                                                                                                                                                                                                                                                                                                                                                                                                                                                                                                                                                                                                                                                                                                                                                                                                                                                                                                                                                                                                                                                                                                                                                                                                                                                                                                                                                                                                                                                                                                                                                                                                                                                                                                                                                                                                                                                                                                                                                                                                                                                                                                                                                                                                                    | ICD-9 Procedure† |
| Amputations                         | <p>oY6CoZ1, oY6CoZ2, oY6CoZ3, oY6DoZ1, oY6DoZ2, oY6DoZ3, oY6HoZ1, oY6HoZ2, oY6HoZ3, oY6JoZ1, oY6JoZ2, oY6JoZ3, oY6MoZo, oY6NoZo, oY6HoZ3, oY6JoZ3, oY6HoZ1, oY6HoZ2, oY6HoZ3, oY6JoZ1, oY6JoZ2, oY6JoZ3, oY6FoZZ, oY6GoZZ, oY6CoZ1, oY6CoZ2, oY6CoZ3, oY6DoZ1, oY6DoZ2, oY6DoZ3, oHQBXXZZ, oHQCXZZ, oHQDXZZ, oHQEXZZ, oHQFXZZ, oHQGXZZ, oHQHXZZ, oHQJXZZ, oHQKXZZ, oHQLXZZ, oHQMXZZ, oHQNXZZ, oX6ooZZ, oX61oZZ, oX62oZZ, oX63oZZ, oX68oZ1, oX68oZ2, oX68oZ3, oX69oZ1, oX69oZ2, oX69oZ3, oX6BoZZ, oX6CoZZ, oX6DoZ1, oX6DoZ2, oX6DoZ3, oX6FoZ1, oX6FoZ2, oX6FoZ3, oX6JoZo, oX6JoZ4, oX6JoZ5, oX6JoZ6, oX6JoZ7, oX6JoZ8, oX6JoZ9, oX6JoZB, oX6JoZC, oX6JoZD, oX6JoZF, oX6KoZo, oX6KoZ4, oX6KoZ5, oX6KoZ6, oX6KoZ7, oX6KoZ8, oX6KoZ9, oX6KoZB, oX6KoZC, oX6KoZD, oX6KoZF, oX6LoZo, oX6LoZ1, oX6LoZ2, oX6LoZ3, oX6MoZo, oX6MoZ1, oX6MoZ2, oX6MoZ3, oX6NoZo, oX6NoZ1, oX6NoZ2, oX6NoZ3, oX6PoZo, oX6PoZ1, oX6PoZ2, oX6PoZ3, oX6QoZo, oX6QoZ1, oX6QoZ2, oX6QoZ3, oX6RoZo, oX6RoZ1, oX6RoZ2, oX6RoZ3, oX6SoZo, oX6SoZ1, oX6SoZ2, oX6SoZ3, oX6ToZo, oX6ToZ1, oX6ToZ2, oX6ToZ3, oX6VoZo, oX6VoZ1, oX6VoZ2, oX6VoZ3, oX6WoZo, oX6WoZ1, oX6WoZ2, oX6WoZ3, oXQ6oZZ, oXQ63ZZ, oXQ64ZZ, oXQ6XZZ, oXQ7oZZ, oXQ73ZZ, oXQ74ZZ, oXQ7XZZ, oXQ8oZZ, oXQ83ZZ, oXQ84ZZ, oXQ8XZZ, oXQ9oZZ, oXQ93ZZ, oXQ94ZZ, oXQ9XZZ, oXQBoZZ, oXQB3ZZ, oXQB4ZZ, oXQBXXZZ, oXQCoZZ, oXQC3ZZ, oXQC4ZZ, oXQCXZZ, oXQDoZZ, oXQD3ZZ, oXQD4ZZ, oXQDXZZ, oXQFoZZ, oXQF3ZZ, oXQF4ZZ, oXQFXZZ, oXQGoZZ, oXQG3ZZ, oXQG4ZZ, oXQGXZZ, oXQHoZZ, oXQH3ZZ, oXQH4ZZ, oXQHXXZZ, oXQJoZZ, oXQJ3ZZ, oXQJ4ZZ, oXQJXXZZ, oXQKoZZ, oXQK3ZZ, oXQK4ZZ, oXQKXXZZ, oXQLoZZ, oXQL3ZZ, oXQL4ZZ, oXQLXXZZ, oXQMoZZ, oXQM3ZZ, oXQM4ZZ, oXQMXZZ, oXQNoZZ, oXQN3ZZ, oXQN4ZZ, oXQNXZZ, oXQPoZZ, oXQP3ZZ, oXQP4ZZ, oXQPXXZZ, oXQQoZZ, oXQQ3ZZ, oXQQ4ZZ, oXQQXXZZ, oXQRoZZ, oXQR3ZZ, oXQR4ZZ, oXQRXXZZ, oXQSoZZ, oXQS3ZZ, oXQS4ZZ, oXQSXXZZ, oXQToZZ, oXQT3ZZ, oXQT4ZZ, oXQTXZZ, oXQVoZZ, oXQV3ZZ, oXQV4ZZ, oXQVXXZZ, oXQWoZZ, oXQW3ZZ, oXQW4ZZ, oXQWXXZZ, oY62oZZ, oY63oZZ, oY64oZZ, oY67oZZ, oY68oZZ, oY6CoZ1, oY6CoZ2, oY6CoZ3, oY6DoZ1, oY6DoZ2, oY6DoZ3, oY6FoZZ, oY6GoZZ, oY6HoZ1, oY6HoZ2, oY6HoZ3, oY6JoZ1, oY6JoZ2, oY6JoZ3, oY6MoZo, oY6MoZ4, oY6MoZ5, oY6MoZ6, oY6MoZ7, oY6MoZ8, oY6MoZ9, oY6MoZB, oY6MoZC, oY6MoZD, oY6MoZF, oY6NoZo, oY6NoZ4, oY6NoZ5, oY6NoZ6, oY6NoZ7, oY6NoZ8, oY6NoZ9, oY6NoZB, oY6NoZC, oY6NoZD, oY6NoZF, oY6PoZo, oY6PoZ1, oY6PoZ2, oY6PoZ3, oY6QoZo, oY6QoZ1, oY6QoZ2, oY6QoZ3, oY6RoZo,</p> | CPT-4 Procedure  |

|  |                                                                                                                                                                                                                                                                                                                                                                                                                                                                                                                                                                                                                                                                                                                                                                                                                                                                                                                                                                                                                                                                                                                                                                                                                                                                                                                                                                                                                                                                                                                                                                                                                                                                                                                                                                                                                                                                                                                                                                                                                                                                                                                                                                                                                                                                                                                                                                                                                                                                                                                                                      |  |
|--|------------------------------------------------------------------------------------------------------------------------------------------------------------------------------------------------------------------------------------------------------------------------------------------------------------------------------------------------------------------------------------------------------------------------------------------------------------------------------------------------------------------------------------------------------------------------------------------------------------------------------------------------------------------------------------------------------------------------------------------------------------------------------------------------------------------------------------------------------------------------------------------------------------------------------------------------------------------------------------------------------------------------------------------------------------------------------------------------------------------------------------------------------------------------------------------------------------------------------------------------------------------------------------------------------------------------------------------------------------------------------------------------------------------------------------------------------------------------------------------------------------------------------------------------------------------------------------------------------------------------------------------------------------------------------------------------------------------------------------------------------------------------------------------------------------------------------------------------------------------------------------------------------------------------------------------------------------------------------------------------------------------------------------------------------------------------------------------------------------------------------------------------------------------------------------------------------------------------------------------------------------------------------------------------------------------------------------------------------------------------------------------------------------------------------------------------------------------------------------------------------------------------------------------------------|--|
|  | <p>oY6RoZ1, oY6RoZ2, oY6RoZ3, oY6SoZo, oY6SoZ1, oY6SoZ2, oY6SoZ3, oY6ToZo, oY6ToZ1, oY6ToZ2, oY6ToZ3, oY6UoZo, oY6UoZ1, oY6UoZ2, oY6UoZ3, oY6VoZo, oY6VoZ1, oY6VoZ2, oY6VoZ3, oY6WoZo, oY6WoZ1, oY6WoZ2, oY6WoZ3, oY6XoZo, oY6XoZ1, oY6XoZ2, oY6XoZ3, oY6YoZo, oY6YoZ1, oY6YoZ2, oY6YoZ3, oYQ9oZZ, oYQ93ZZ, oYQ94ZZ, oYQ9XZZ, oYQBoZZ, oYQB3ZZ, oYQB4ZZ, oYQBXZZ, oYQCoZZ, oYQC3ZZ, oYQC4ZZ, oYQCXZZ, oYQDoZZ, oYQD3ZZ, oYQD4ZZ, oYQDXZZ, oYQFoZZ, oYQF3ZZ, oYQF4ZZ, oYQFXZZ, oYQGoZZ, oYQG3ZZ, oYQG4ZZ, oYQGXXZZ, oYQHoZZ, oYQH3ZZ, oYQH4ZZ, oYQHXXZZ, oYQJoZZ, oYQJ3ZZ, oYQJ4ZZ, oYQJXXZZ, oYQKoZZ, oYQK3ZZ, oYQK4ZZ, oYQKXXZZ, oYQLoZZ, oYQL3ZZ, oYQL4ZZ, oYQLXXZZ, oYQMoZZ, oYQM3ZZ, oYQM4ZZ, oYQMXZZ, oYQNoZZ, oYQN3ZZ, oYQN4ZZ, oYQNXZZ, oYQPoZZ, oYQP3ZZ, oYQP4ZZ, oYQPXXZZ, oYQOoZZ, oYQO3ZZ, oYQO4ZZ, oYQOXXZZ, oYQRoZZ, oYQR3ZZ, oYQR4ZZ, oYQRXXZZ, oYQSoZZ, oYQS3ZZ, oYQS4ZZ, oYQSXXZZ, oYQToZZ, oYQT3ZZ, oYQT4ZZ, oYQTXZZ, oYQUoZZ, oYQU3ZZ, oYQU4ZZ, oYQUXXZZ, oYQVoZZ, oYQV3ZZ, oYQV4ZZ, oYQVXXZZ, oYQWoZZ, oYQW3ZZ, oYQW4ZZ, oYQWXXZZ, oYQXoZZ, oYQX3ZZ, oYQX4ZZ, oYQXXZZ, oYQYoZZ, oYQY3ZZ, oYQY4ZZ, oYQYXXZZ, FoDZ8UZ, FoDZ8ZZ, FoDZ8UZ, FoDZ8UZ, FoDZ8UZ, oXH8oYZ, oXH83YZ, oXH84YZ, oXH9oYZ, oXH93YZ, oXH94YZ, oXHB0YZ, oXHB3YZ, oXHB4YZ, oXHC0YZ, oXHC3YZ, oXHC4YZ, oXHD0YZ, oXHD3YZ, oXHD4YZ, oXHF0YZ, oXHF3YZ, oXHF4YZ, oXHGoYZ, oXHG3YZ, oXHG4YZ, oXHH0YZ, oXHH3YZ, oXHH4YZ, FoDZ8UZ, FoDZ8UZ, FoDZ8UZ, oYHC0YZ, oYHC3YZ, oYHC4YZ, oYHD0YZ, oYHD3YZ, oYHD4YZ, oYHF0YZ, oYHF3YZ, oYHF4YZ, oYHGoYZ, oYHG3YZ, oYHG4YZ, oYHH0YZ, oYHH3YZ, oYHH4YZ, oYHJoYZ, oYHJ3YZ, oYHJ4YZ, NoPCS, 3EoUoGB, 3EoU3GB, 3EoVoGB, 3EoV3GB, oPHCo8Z, oPHC38Z, oPHC48Z, oPHDo8Z, oPHD38Z, oPHD48Z, oPHFo8Z, oPHF38Z, oPHF48Z, oPHGo8Z, oPHG38Z, oPHG48Z, oPHHo8Z, oPHH38Z, oPHH48Z, oPHJo8Z, oPHJ38Z, oPHJ48Z, oPHKo8Z, oPHK38Z, oPHK48Z, oPHLo8Z, oPHL38Z, oPHL48Z, oQH6o8Z, oQH638Z, oQH648Z, oQH7o8Z, oQH738Z, oQH748Z, oQH8o8Z, oQH838Z, oQH848Z, oQH9o8Z, oQH938Z, oQH948Z, oQHBo8Z, oQHB38Z, oQHB48Z, oQHC08Z, oQHC38Z, oQHC48Z, oQHGo8Z, oQHG38Z, oQHG48Z, oQHHo8Z, oQHH38Z, oQHH48Z, oQHJo8Z, oQHJ38Z, oQHJ48Z, oQHKo8Z, oQHK38Z, oQHK48Z, oY6CoZ1, oY6CoZ2, oY6CoZ3, oY6DoZ1, oY6DoZ2, oY6DoZ3, oY6HoZ1, oY6HoZ2, oY6HoZ3, oY6JoZ1, oY6JoZ2, oY6JoZ3, oY6MoZo, oY6NoZo, oY6HoZ3, oY6JoZ3, oY6HoZ1, oY6HoZ2, oY6HoZ3, oY6JoZ1, oY6JoZ2, oY6JoZ3, oY6FoZZ, oY6GoZZ, oY6CoZ1, oY6CoZ2, oY6CoZ3, oY6DoZ1, oY6DoZ2, oY6DoZ3, oHQBXXZZ, oHQCXZZ, oHQDXZZ, oHQEXZZ, oHQFXZZ, oHQGXZZ, oHQHXZZ, oHQJXXZZ, oHQKXXZZ, oHQLXXZZ, oHQMXXZZ, oHQNXZZ,</p> |  |
|--|------------------------------------------------------------------------------------------------------------------------------------------------------------------------------------------------------------------------------------------------------------------------------------------------------------------------------------------------------------------------------------------------------------------------------------------------------------------------------------------------------------------------------------------------------------------------------------------------------------------------------------------------------------------------------------------------------------------------------------------------------------------------------------------------------------------------------------------------------------------------------------------------------------------------------------------------------------------------------------------------------------------------------------------------------------------------------------------------------------------------------------------------------------------------------------------------------------------------------------------------------------------------------------------------------------------------------------------------------------------------------------------------------------------------------------------------------------------------------------------------------------------------------------------------------------------------------------------------------------------------------------------------------------------------------------------------------------------------------------------------------------------------------------------------------------------------------------------------------------------------------------------------------------------------------------------------------------------------------------------------------------------------------------------------------------------------------------------------------------------------------------------------------------------------------------------------------------------------------------------------------------------------------------------------------------------------------------------------------------------------------------------------------------------------------------------------------------------------------------------------------------------------------------------------------|--|

|  |                                                                                                                                                                                                                                                                                                                                                                                                                                                                                                                                                                                                                                                                                                                                                                                                                                                                                                                                                                                                                                                                                                                                                                                                                                                                                                                                                                                                                                                                                                                                                                                                                                                                                                                                                                                                                                                                                                                                                                                                                                                                                                                                                                                                                                                                                                                                                                                                                                                                                                                                                                                    |  |
|--|------------------------------------------------------------------------------------------------------------------------------------------------------------------------------------------------------------------------------------------------------------------------------------------------------------------------------------------------------------------------------------------------------------------------------------------------------------------------------------------------------------------------------------------------------------------------------------------------------------------------------------------------------------------------------------------------------------------------------------------------------------------------------------------------------------------------------------------------------------------------------------------------------------------------------------------------------------------------------------------------------------------------------------------------------------------------------------------------------------------------------------------------------------------------------------------------------------------------------------------------------------------------------------------------------------------------------------------------------------------------------------------------------------------------------------------------------------------------------------------------------------------------------------------------------------------------------------------------------------------------------------------------------------------------------------------------------------------------------------------------------------------------------------------------------------------------------------------------------------------------------------------------------------------------------------------------------------------------------------------------------------------------------------------------------------------------------------------------------------------------------------------------------------------------------------------------------------------------------------------------------------------------------------------------------------------------------------------------------------------------------------------------------------------------------------------------------------------------------------------------------------------------------------------------------------------------------------|--|
|  | <p>oX6ooZZ, oX6ioZZ, oX6zoZZ, oX63oZZ, oX68oZ1, oX68oZ2, oX68oZ3, oX69oZ1, oX69oZ2, oX69oZ3, oX6BoZZ, oX6CoZZ, oX6DoZ1, oX6DoZ2, oX6DoZ3, oX6FoZ1, oX6FoZ2, oX6FoZ3, oX6JoZo, oX6JoZ4, oX6JoZ5, oX6JoZ6, oX6JoZ7, oX6JoZ8, oX6JoZ9, oX6JoZB, oX6JoZC, oX6JoZD, oX6JoZF, oX6KoZo, oX6KoZ4, oX6KoZ5, oX6KoZ6, oX6KoZ7, oX6KoZ8, oX6KoZ9, oX6KoZB, oX6KoZC, oX6KoZD, oX6KoZF, oX6LoZo, oX6LoZ1, oX6LoZ2, oX6LoZ3, oX6MoZo, oX6MoZ1, oX6MoZ2, oX6MoZ3, oX6NoZo, oX6NoZ1, oX6NoZ2, oX6NoZ3, oX6PoZo, oX6PoZ1, oX6PoZ2, oX6PoZ3, oX6QoZo, oX6QoZ1, oX6QoZ2, oX6QoZ3, oX6RoZo, oX6RoZ1, oX6RoZ2, oX6RoZ3, oX6SoZo, oX6SoZ1, oX6SoZ2, oX6SoZ3, oX6ToZo, oX6ToZ1, oX6ToZ2, oX6ToZ3, oX6VoZo, oX6VoZ1, oX6VoZ2, oX6VoZ3, oX6WoZo, oX6WoZ1, oX6WoZ2, oX6WoZ3, oXQ6oZZ, oXQ63ZZ, oXQ64ZZ, oXQ6XZZ, oXQ7oZZ, oXQ73ZZ, oXQ74ZZ, oXQ7XZZ, oXQ8oZZ, oXQ83ZZ, oXQ84ZZ, oXQ8XZZ, oXQ9oZZ, oXQ93ZZ, oXQ94ZZ, oXQ9XZZ, oXQBoZZ, oXQB3ZZ, oXQB4ZZ, oXQBXZZ, oXQCoZZ, oXQC3ZZ, oXQC4ZZ, oXQCXZZ, oXQDoZZ, oXQD3ZZ, oXQD4ZZ, oXQDXZZ, oXQFoZZ, oXQF3ZZ, oXQF4ZZ, oXQFXZZ, oXQGoZZ, oXQG3ZZ, oXQG4ZZ, oXQGXZZ, oXQHoZZ, oXQH3ZZ, oXQH4ZZ, oXQHXXZZ, oXQJoZZ, oXQJ3ZZ, oXQJ4ZZ, oXQJXZZ, oXQKoZZ, oXQK3ZZ, oXQK4ZZ, oXQKXZZ, oXQLoZZ, oXQL3ZZ, oXQL4ZZ, oXQLXZZ, oXQMoZZ, oXQM3ZZ, oXQM4ZZ, oXQMXZZ, oXQNoZZ, oXQN3ZZ, oXQN4ZZ, oXQNXZZ, oXQPoZZ, oXQP3ZZ, oXQP4ZZ, oXQPXZZ, oXQQoZZ, oXQQ3ZZ, oXQQ4ZZ, oXQQXZZ, oXQRoZZ, oXQR3ZZ, oXQR4ZZ, oXQRXZZ, oXQSoZZ, oXQS3ZZ, oXQS4ZZ, oXQSXZZ, oXQToZZ, oXQT3ZZ, oXQT4ZZ, oXQTXZZ, oXQVoZZ, oXQV3ZZ, oXQV4ZZ, oXQVXZZ, oXQWoZZ, oXQW3ZZ, oXQW4ZZ, oXQWXZZ, oY6zoZZ, oY63oZZ, oY64oZZ, oY67oZZ, oY68oZZ, oY6CoZ1, oY6CoZ2, oY6CoZ3, oY6DoZ1, oY6DoZ2, oY6DoZ3, oY6FoZZ, oY6GoZZ, oY6HoZ1, oY6HoZ2, oY6HoZ3, oY6JoZ1, oY6JoZ2, oY6JoZ3, oY6MoZo, oY6MoZ4, oY6MoZ5, oY6MoZ6, oY6MoZ7, oY6MoZ8, oY6MoZ9, oY6MoZB, oY6MoZC, oY6MoZD, oY6MoZF, oY6NoZo, oY6NoZ4, oY6NoZ5, oY6NoZ6, oY6NoZ7, oY6NoZ8, oY6NoZ9, oY6NoZB, oY6NoZC, oY6NoZD, oY6NoZF, oY6PoZo, oY6PoZ1, oY6PoZ2, oY6PoZ3, oY6QoZo, oY6QoZ1, oY6QoZ2, oY6QoZ3, oY6RoZo, oY6RoZ1, oY6RoZ2, oY6RoZ3, oY6SoZo, oY6SoZ1, oY6SoZ2, oY6SoZ3, oY6ToZo, oY6ToZ1, oY6ToZ2, oY6ToZ3, oY6UoZo, oY6UoZ1, oY6UoZ2, oY6UoZ3, oY6VoZo, oY6VoZ1, oY6VoZ2, oY6VoZ3, oY6WoZo, oY6WoZ1, oY6WoZ2, oY6WoZ3, oY6XoZo, oY6XoZ1, oY6XoZ2, oY6XoZ3, oY6YoZo, oY6YoZ1, oY6YoZ2, oY6YoZ3, oYQ9oZZ, oYQ93ZZ, oYQ94ZZ, oYQ9XZZ, oYQBoZZ, oYQB3ZZ, oYQB4ZZ, oYQBXZZ, oYQCoZZ, oYQC3ZZ, oYQC4ZZ, oYQCXZZ, oYQDoZZ, oYQD3ZZ, oYQD4ZZ, oYQDXZZ, oYQFoZZ, oYQF3ZZ, oYQF4ZZ, oYQFXZZ, oYQGoZZ, oYQG3ZZ, oYQG4ZZ, oYQGXZZ, oYQHoZZ, oYQH3ZZ,</p> |  |
|--|------------------------------------------------------------------------------------------------------------------------------------------------------------------------------------------------------------------------------------------------------------------------------------------------------------------------------------------------------------------------------------------------------------------------------------------------------------------------------------------------------------------------------------------------------------------------------------------------------------------------------------------------------------------------------------------------------------------------------------------------------------------------------------------------------------------------------------------------------------------------------------------------------------------------------------------------------------------------------------------------------------------------------------------------------------------------------------------------------------------------------------------------------------------------------------------------------------------------------------------------------------------------------------------------------------------------------------------------------------------------------------------------------------------------------------------------------------------------------------------------------------------------------------------------------------------------------------------------------------------------------------------------------------------------------------------------------------------------------------------------------------------------------------------------------------------------------------------------------------------------------------------------------------------------------------------------------------------------------------------------------------------------------------------------------------------------------------------------------------------------------------------------------------------------------------------------------------------------------------------------------------------------------------------------------------------------------------------------------------------------------------------------------------------------------------------------------------------------------------------------------------------------------------------------------------------------------------|--|

|  |                                                                                                                                                                                                                                                                                                                                                                                                                                                                                                                                                                                                                                                                                                                                                                                                                                                                                                                                                                                                                                                                                                                                                                                                                                                                                                                                                                                                                                                                                                                                                                                                                                                                                                                                                                                                                                                                                                                                                                                                                                                                                                                                                                                                                                                                                                                                                                                                                                                                                                                                                                                                                                                                                                                                  |  |
|--|----------------------------------------------------------------------------------------------------------------------------------------------------------------------------------------------------------------------------------------------------------------------------------------------------------------------------------------------------------------------------------------------------------------------------------------------------------------------------------------------------------------------------------------------------------------------------------------------------------------------------------------------------------------------------------------------------------------------------------------------------------------------------------------------------------------------------------------------------------------------------------------------------------------------------------------------------------------------------------------------------------------------------------------------------------------------------------------------------------------------------------------------------------------------------------------------------------------------------------------------------------------------------------------------------------------------------------------------------------------------------------------------------------------------------------------------------------------------------------------------------------------------------------------------------------------------------------------------------------------------------------------------------------------------------------------------------------------------------------------------------------------------------------------------------------------------------------------------------------------------------------------------------------------------------------------------------------------------------------------------------------------------------------------------------------------------------------------------------------------------------------------------------------------------------------------------------------------------------------------------------------------------------------------------------------------------------------------------------------------------------------------------------------------------------------------------------------------------------------------------------------------------------------------------------------------------------------------------------------------------------------------------------------------------------------------------------------------------------------|--|
|  | <p>oYQH4ZZ, oYQHxZZ, oYQJoZZ, oYQJ3ZZ, oYQJ4ZZ,<br/>oYQJxZZ, oYQKoZZ, oYQK3ZZ, oYQK4ZZ, oYQKxZZ,<br/>oYQLoZZ, oYQL3ZZ, oYQL4ZZ, oYQLxZZ, oYQMoZZ,<br/>oYQM3ZZ, oYQM4ZZ, oYQMXZZ, oYQNoZZ, oYQN3ZZ,<br/>oYQN4ZZ, oYQNXZZ, oYQPoZZ, oYQP3ZZ, oYQP4ZZ,<br/>oYQPXZZ, oYQQoZZ, oYQQ3ZZ, oYQQ4ZZ, oYQQXZZ,<br/>oYQRoZZ, oYQR3ZZ, oYQR4ZZ, oYQRXZZ, oYQSoZZ,<br/>oYQS3ZZ, oYQS4ZZ, oYQSxZZ, oYQToZZ, oYQT3ZZ,<br/>oYQT4ZZ, oYQTxZZ, oYQUoZZ, oYQU3ZZ, oYQU4ZZ,<br/>oYQUXZZ, oYQVoZZ, oYQV3ZZ, oYQV4ZZ, oYQVxZZ,<br/>oYQWoZZ, oYQW3ZZ, oYQW4ZZ, oYQWxZZ, oYQXoZZ,<br/>oYQX3ZZ, oYQX4ZZ, oYQXXZZ, oYQYoZZ, oYQY3ZZ,<br/>oYQY4ZZ, oYQYxZZ, FoDZ8UZ, FoDZ8UZ, FoDZ8UZ,<br/>FoDZ8UZ, FoDZ8UZ, oXH8oYZ, oXH83YZ, oXH84YZ,<br/>oXH9oYZ, oXH93YZ, oXH94YZ, oXHBoYZ, oXHB3YZ,<br/>oXHB4YZ, oXHCoYZ, oXHC3YZ, oXHC4YZ, oXHDoYZ,<br/>oXHD3YZ, oXHD4YZ, oXHFoYZ, oXHF3YZ, oXHF4YZ,<br/>oXHGoYZ, oXHG3YZ, oXHG4YZ, oXHHoYZ, oXHH3YZ,<br/>oXHH4YZ, FoDZ8UZ, FoDZ8UZ, FoDZ8UZ, oYHCoyZ,<br/>oYHC3YZ, oYHC4YZ, oYHDoyZ, oYHD3YZ, oYHD4YZ,<br/>oYHfoYZ, oYHF3YZ, oYHF4YZ, oYHGoYZ, oYHG3YZ,<br/>oYHG4YZ, oYHHoyZ, oYHH3YZ, oYHH4YZ, oYHJoYZ,<br/>oYHJ3YZ, oYHJ4YZ, NoPCS, 3EoUoGB, 3EoU3GB, 3EoVoGB,<br/>3EoV3GB, oPHCo8Z, oPHC38Z, oPHC48Z, oPHDo8Z,<br/>oPHD38Z, oPHD48Z, oPHFo8Z, oPHF38Z, oPHF48Z,<br/>oPHGo8Z, oPHG38Z, oPHG48Z, oPHHo8Z, oPHH38Z,<br/>oPHH48Z, oPHJo8Z, oPHJ38Z, oPHJ48Z, oPHKo8Z,<br/>oPHK38Z, oPHK48Z, oPHLo8Z, oPHL38Z, oPHL48Z,<br/>oQH6o8Z, oQH638Z, oQH648Z, oQH7o8Z, oQH738Z,<br/>oQH748Z, oQH8o8Z, oQH838Z, oQH848Z, oQH9o8Z,<br/>oQH938Z, oQH948Z, oQHBo8Z, oQHB38Z, oQHB48Z,<br/>oQHCo8Z, oQHC38Z, oQHC48Z, oQHGo8Z, oQHG38Z,<br/>oQHG48Z, oQHHo8Z, oQHH38Z, oQHH48Z, oQHJo8Z,<br/>oQHJ38Z, oQHJ48Z, oQHKo8Z, oQHK38Z, oQHK48Z,<br/>oY6PoZo, oY6PoZ1, oY6PoZ2, oY6PoZ3, oY6QoZo,<br/>oY6QoZ1, oY6QoZ2, oY6QoZ3, oY6RoZo, oY6RoZ1,<br/>oY6RoZ2, oY6RoZ3, oY6SoZo, oY6SoZ1, oY6SoZ2, oY6SoZ3,<br/>oY6ToZo, oY6ToZ1, oY6ToZ2, oY6ToZ3, oY6UoZo,<br/>oY6UoZ1, oY6UoZ2, oY6UoZ3, oY6VoZo, oY6VoZ1,<br/>oY6VoZ2, oY6VoZ3, oY6WoZo, oY6WoZ1, oY6WoZ2,<br/>oY6WoZ3, oY6XoZo, oY6XoZ1, oY6XoZ2, oY6XoZ3,<br/>oY6YoZo, oY6YoZ1, oY6YoZ2, oY6YoZ3, oY6MoZ4,<br/>oY6MoZ5, oY6MoZ6, oY6MoZ7, oY6MoZ8, oY6MoZ9,<br/>oY6MoZB, oY6MoZC, oY6MoZD, oY6MoZF, oY6NoZ4,<br/>oY6NoZ5, oY6NoZ6, oY6NoZ7, oY6NoZ8, oY6NoZ9,<br/>oY6NoZB, oY6NoZC, oY6NoZD, oY6NoZF, oY6PoZo,<br/>oY6PoZ1, oY6PoZ2, oY6PoZ3, oY6QoZo, oY6QoZ1,<br/>oY6QoZ2, oY6QoZ3, oY6RoZo, oY6RoZ1, oY6RoZ2,<br/>oY6RoZ3, oY6SoZo, oY6SoZ1, oY6SoZ2, oY6SoZ3, oY6ToZo,<br/>oY6ToZ1, oY6ToZ2, oY6ToZ3, oY6UoZo, oY6UoZ1,<br/>oY6UoZ2, oY6UoZ3, oY6VoZo, oY6VoZ1, oY6VoZ2,<br/>oY6VoZ3, oY6WoZo, oY6WoZ1, oY6WoZ2, oY6WoZ3,<br/>oY6XoZo, oY6XoZ1, oY6XoZ2, oY6XoZ3, oY6YoZo,</p> |  |
|--|----------------------------------------------------------------------------------------------------------------------------------------------------------------------------------------------------------------------------------------------------------------------------------------------------------------------------------------------------------------------------------------------------------------------------------------------------------------------------------------------------------------------------------------------------------------------------------------------------------------------------------------------------------------------------------------------------------------------------------------------------------------------------------------------------------------------------------------------------------------------------------------------------------------------------------------------------------------------------------------------------------------------------------------------------------------------------------------------------------------------------------------------------------------------------------------------------------------------------------------------------------------------------------------------------------------------------------------------------------------------------------------------------------------------------------------------------------------------------------------------------------------------------------------------------------------------------------------------------------------------------------------------------------------------------------------------------------------------------------------------------------------------------------------------------------------------------------------------------------------------------------------------------------------------------------------------------------------------------------------------------------------------------------------------------------------------------------------------------------------------------------------------------------------------------------------------------------------------------------------------------------------------------------------------------------------------------------------------------------------------------------------------------------------------------------------------------------------------------------------------------------------------------------------------------------------------------------------------------------------------------------------------------------------------------------------------------------------------------------|--|

|                                |                                                                                                                                                                                                                                                                                                                                                                                                                                                                                                                                                                                                                                                                                                                                                                                                                                                                                                                                                                                                                                                                                                                                                                                                                                                                                                                                                                                                                                                                                                                                                                                                                                                                                                                                                                                                                                                                                                                                                                                                                                                                                                                                                          |                                             |
|--------------------------------|----------------------------------------------------------------------------------------------------------------------------------------------------------------------------------------------------------------------------------------------------------------------------------------------------------------------------------------------------------------------------------------------------------------------------------------------------------------------------------------------------------------------------------------------------------------------------------------------------------------------------------------------------------------------------------------------------------------------------------------------------------------------------------------------------------------------------------------------------------------------------------------------------------------------------------------------------------------------------------------------------------------------------------------------------------------------------------------------------------------------------------------------------------------------------------------------------------------------------------------------------------------------------------------------------------------------------------------------------------------------------------------------------------------------------------------------------------------------------------------------------------------------------------------------------------------------------------------------------------------------------------------------------------------------------------------------------------------------------------------------------------------------------------------------------------------------------------------------------------------------------------------------------------------------------------------------------------------------------------------------------------------------------------------------------------------------------------------------------------------------------------------------------------|---------------------------------------------|
|                                | oY6YoZ1, oY6YoZ2, oY6YoZ3, oY6MoZ4, oY6MoZ5, oY6MoZ6, oY6MoZ7, oY6MoZ8, oY6MoZ9, oY6MoZB, oY6MoZC, oY6MoZD, oY6MoZF, oY6NoZ4, oY6NoZ5, oY6NoZ6, oY6NoZ7, oY6NoZ8, oY6NoZ9, oY6NoZB, oY6NoZC, oY6NoZD, oY6NoZF                                                                                                                                                                                                                                                                                                                                                                                                                                                                                                                                                                                                                                                                                                                                                                                                                                                                                                                                                                                                                                                                                                                                                                                                                                                                                                                                                                                                                                                                                                                                                                                                                                                                                                                                                                                                                                                                                                                                            |                                             |
| Risk Factors                   |                                                                                                                                                                                                                                                                                                                                                                                                                                                                                                                                                                                                                                                                                                                                                                                                                                                                                                                                                                                                                                                                                                                                                                                                                                                                                                                                                                                                                                                                                                                                                                                                                                                                                                                                                                                                                                                                                                                                                                                                                                                                                                                                                          |                                             |
| History of diabetes            | Per the Elixhauser algorithm for comorbidity measures                                                                                                                                                                                                                                                                                                                                                                                                                                                                                                                                                                                                                                                                                                                                                                                                                                                                                                                                                                                                                                                                                                                                                                                                                                                                                                                                                                                                                                                                                                                                                                                                                                                                                                                                                                                                                                                                                                                                                                                                                                                                                                    | ICD-10 Diagnosis                            |
| Diabetic nephropathy           | Has a history of diabetes + R80, R80.0, R80.1, R80.2, R80.3, R80.8, R80.9                                                                                                                                                                                                                                                                                                                                                                                                                                                                                                                                                                                                                                                                                                                                                                                                                                                                                                                                                                                                                                                                                                                                                                                                                                                                                                                                                                                                                                                                                                                                                                                                                                                                                                                                                                                                                                                                                                                                                                                                                                                                                | ICD-10 Diagnosis                            |
| Carotid stenosis               | I62.2, I65.21, I65.22, I65.23, I65.29                                                                                                                                                                                                                                                                                                                                                                                                                                                                                                                                                                                                                                                                                                                                                                                                                                                                                                                                                                                                                                                                                                                                                                                                                                                                                                                                                                                                                                                                                                                                                                                                                                                                                                                                                                                                                                                                                                                                                                                                                                                                                                                    | ICD-10 Diagnosis                            |
| Hypertension despite treatment | Per the Elixhauser algorithm for comorbidity measures<br>Amlodipine Besylate/Benazepril Hydrochloride, Amlodipine Besylate/HCTZ/Olmesartan Medoxomil, Amlodipine Besylate/Hydrochlorothiazide/Valsartan, Amlodipine Besylate/Olmesartan Medoxomil, Amlodipine Besylate/Telmisartan, Amlodipine Besylate/Valsartan, Azilsartan Medoxomil, Azilsartan Medoxomil/Chlorthalidone, Benazepril Hydrochloride, Benazepril Hydrochloride/Hydrochlorothiazide, Candesartan Cilexetil, Candesartan Cilexetil/Hydrochlorothiazide, Captopril, Captopril/Hydrochlorothiazide, Enalapril Maleate, Enalapril Maleate/Hydrochlorothiazide, Eprosartan Mesylate, Eprosartan Mesylate/Hydrochlorothiazide, Fosinopril Sodium, Fosinopril Sodium/Hydrochlorothiazide, Hydrochlorothiazide/Irbesartan, Hydrochlorothiazide/Lisinopril, Hydrochlorothiazide/Losartan Potassium, Hydrochlorothiazide/Moexipril Hydrochloride, Hydrochlorothiazide/Olmesartan Medoxomil, Hydrochlorothiazide/Quinapril Hydrochloride, Hydrochlorothiazide/Telmisartan, Hydrochlorothiazide/Valsartan, Irbesartan, Lisinopril, Losartan Potassium, Moexipril Hydrochloride, Olmesartan Medoxomil, Perindopril Erbumine, Quinapril Hydrochloride, Ramipril, Telmisartan, Trandolapril, Trandolapril/Verapamil Hydrochloride, Valsartan, Eplerenone, Hydrochlorothiazide/Spiroinolactone, Spiroinolactone, Acebutolol Hydrochloride, Atenolol, Atenolol/Chlorthalidone, Bendroflumethiazide/Nadolol, Betaxolol Hydrochloride, Bisoprolol Fumarate, Bisoprolol Fumarate/Hydrochlorothiazide, Carvedilol, Hydrochlorothiazide/Metoprolol Succinate, Hydrochlorothiazide/Metoprolol Tartrate, Hydrochlorothiazide/Propranolol Hydrochloride, Labetalol Hydrochloride, Metoprolol Succinate, Metoprolol Tartrate, Nadolol, Nebivolol Hydrochloride, Penbutolol Sulfate, Pindolol, Propranolol Hydrochloride, Sotalol Hydrochloride, Timolol, Aliskiren/Amlodipine Besylate, Aliskiren/Amlodipine Besylate/Hydrochlorothiazide, Amlodipine Besylate, Amlodipine Besylate/Atorvastatin Calcium, Amlodipine Besylate/Benazepril Hydrochloride, Amlodipine Besylate/HCTZ/Olmesartan Medoxomil, Amlodipine | ICD-10 Diagnosis<br>Medication Billing Code |

|                                              |                                                                                                                                                                                                                                                                                                                                                                                                                                                                                                                                                                                                                                                                                                                                                                                                                                                                                                                                                                                                                                                                                                                                                                                                                                                                                                                                                                                                                                                                                                                                                                                                                                                                                                                                                                                                                                                                                                                                                                                                              |                         |
|----------------------------------------------|--------------------------------------------------------------------------------------------------------------------------------------------------------------------------------------------------------------------------------------------------------------------------------------------------------------------------------------------------------------------------------------------------------------------------------------------------------------------------------------------------------------------------------------------------------------------------------------------------------------------------------------------------------------------------------------------------------------------------------------------------------------------------------------------------------------------------------------------------------------------------------------------------------------------------------------------------------------------------------------------------------------------------------------------------------------------------------------------------------------------------------------------------------------------------------------------------------------------------------------------------------------------------------------------------------------------------------------------------------------------------------------------------------------------------------------------------------------------------------------------------------------------------------------------------------------------------------------------------------------------------------------------------------------------------------------------------------------------------------------------------------------------------------------------------------------------------------------------------------------------------------------------------------------------------------------------------------------------------------------------------------------|-------------------------|
|                                              | <p>Besylate/Hydrochlorothiazide/Valsartan, Amlodipine<br/> Besylate/Olmesartan Medoxomil, Amlodipine<br/> Besylate/Telmisartan, Amlodipine Besylate/Valsartan,<br/> Felodipine, Isradipine, Nifedipine, Nisoldipine, Diltiazem<br/> Hydrochloride, Aliskiren/Amlodipine<br/> Besylate/Hydrochlorothiazide, Aliskiren/Hydrochlorothiazide,<br/> Amiloride Hydrochloride/Hydrochlorothiazide, Amlodipine<br/> Besylate/Hydrochlorothiazide/Valsartan,<br/> Atenolol/Chlorthalidone, Azilsartan<br/> Medoxomil/Chlorthalidone, Benazepril<br/> Hydrochloride/Hydrochlorothiazide, Bisoprolol<br/> Fumarate/Hydrochlorothiazide, Candesartan<br/> Cilexetil/Hydrochlorothiazide, Captopril/Hydrochlorothiazide,<br/> Chlorothiazide, Chlorothiazide Sodium,<br/> Chlorothiazide/Methyldopa, Chlorothiazide/Reserpine,<br/> Chlorthalidone, Chlorthalidone/Clonidine Hydrochloride,<br/> Cryptenamine/Methyclothiazide,<br/> Cryptenamine/Methyclothiazide,<br/> Deserpidine/Hydrochlorothiazide, Enalapril<br/> Maleate/Hydrochlorothiazide, Eprosartan<br/> Mesylate/Hydrochlorothiazide, Fosinopril<br/> Sodium/Hydrochlorothiazide, Guanethidine<br/> Monosulfate/Hydrochlorothiazide, Hydralazine<br/> Hydrochloride/Hydrochlorothiazide, Hydrochlorothiazide,<br/> Hydrochlorothiazide/Lisinopril,<br/> Hydrochlorothiazide/Losartan Potassium,<br/> Hydrochlorothiazide/Methyldopa,<br/> Hydrochlorothiazide/Metoprolol Succinate,<br/> Hydrochlorothiazide/Metoprolol Tartrate,<br/> Hydrochlorothiazide/Moexipril Hydrochloride,<br/> Hydrochlorothiazide/Olmesartan Medoxomil,<br/> Hydrochlorothiazide/Propranolol Hydrochloride,<br/> Hydrochlorothiazide/Quinapril Hydrochloride,<br/> Hydrochlorothiazide/Reserpine,<br/> Hydrochlorothiazide/Spironolactone,<br/> Hydrochlorothiazide/Telmisartan,<br/> Hydrochlorothiazide/Triamterene,<br/> Hydrochlorothiazide/Valsartan, Indapamide,<br/> Methyclothiazide, Metolazone, Trandolapril/Verapamil<br/> Hydrochloride, Verapamil Hydrochloride</p> |                         |
| Hypercholesterolemia treated with medication | <p>Amlodipine Besylate/Atorvastatin Calcium, Atorvastatin<br/> Calcium, Atorvastatin Calcium/Ezetimibe,<br/> Ezetimibe/Simvastatin, Fluvastatin Sodium, Lovastatin,<br/> Lovastatin/Niacin, Niacin/Simvastatin, Pitavastatin Calcium,<br/> Pravastatin Sodium, Rosuvastatin Calcium, Simvastatin,<br/> Simvastatin/Sitagliptin Phosphate, Cholestyramine,<br/> Colesevelam, Colestipol Hydrochloride, Ezetimibe,<br/> Fenofibrate, Gemfibrozil, Lomitapide Mesylate, Niacin,<br/> Omega-3-Acid Ethyl Esters</p>                                                                                                                                                                                                                                                                                                                                                                                                                                                                                                                                                                                                                                                                                                                                                                                                                                                                                                                                                                                                                                                                                                                                                                                                                                                                                                                                                                                                                                                                                              | Medication Billing Code |
| Smoker                                       | <p>F17.20, F17.200, F17.201, F17.203, F17.208, F17.209, F17.21,<br/> F17.210, F17.211, F17.213, F17.218, F17.219, F17.29, F17.290,<br/> F17.291, F17.293, F17.298, F17.299, Z72.0</p>                                                                                                                                                                                                                                                                                                                                                                                                                                                                                                                                                                                                                                                                                                                                                                                                                                                                                                                                                                                                                                                                                                                                                                                                                                                                                                                                                                                                                                                                                                                                                                                                                                                                                                                                                                                                                        | ICD-10 Diagnosis        |

|                                     |                                                                                                                                                                                                                                                                                                                                                                                                                                                                                                                                                                                                                                                                                                                                                                                                                                                                                                                                                                                                                                                                                                                                                                                                                                                                                                                                                                                                                                                                                                                                                                                                                                                                                                                                                                                                                                                                                                                                                                                                                                                                                                                                                                                                                                                                                                                                                         |                  |
|-------------------------------------|---------------------------------------------------------------------------------------------------------------------------------------------------------------------------------------------------------------------------------------------------------------------------------------------------------------------------------------------------------------------------------------------------------------------------------------------------------------------------------------------------------------------------------------------------------------------------------------------------------------------------------------------------------------------------------------------------------------------------------------------------------------------------------------------------------------------------------------------------------------------------------------------------------------------------------------------------------------------------------------------------------------------------------------------------------------------------------------------------------------------------------------------------------------------------------------------------------------------------------------------------------------------------------------------------------------------------------------------------------------------------------------------------------------------------------------------------------------------------------------------------------------------------------------------------------------------------------------------------------------------------------------------------------------------------------------------------------------------------------------------------------------------------------------------------------------------------------------------------------------------------------------------------------------------------------------------------------------------------------------------------------------------------------------------------------------------------------------------------------------------------------------------------------------------------------------------------------------------------------------------------------------------------------------------------------------------------------------------------------|------------------|
| Major adverse cardiovascular events |                                                                                                                                                                                                                                                                                                                                                                                                                                                                                                                                                                                                                                                                                                                                                                                                                                                                                                                                                                                                                                                                                                                                                                                                                                                                                                                                                                                                                                                                                                                                                                                                                                                                                                                                                                                                                                                                                                                                                                                                                                                                                                                                                                                                                                                                                                                                                         |                  |
| Myocardial infarction               | I21, I21.0, I21.01, I21.02, I21.09, I21.1, I21.11, I21.19, I21.2, I21.21, I21.29, I21.3, I21.4, I22, I22.0, I22.1, I22.2, I22.8, I22.9, I23, I23.0, I23.1, I23.2, I23.3, I23.4, I23.5, I23.6, I23.7, I23.8, I25.2                                                                                                                                                                                                                                                                                                                                                                                                                                                                                                                                                                                                                                                                                                                                                                                                                                                                                                                                                                                                                                                                                                                                                                                                                                                                                                                                                                                                                                                                                                                                                                                                                                                                                                                                                                                                                                                                                                                                                                                                                                                                                                                                       | ICD-10 Diagnosis |
| Ischemic stroke                     | I63                                                                                                                                                                                                                                                                                                                                                                                                                                                                                                                                                                                                                                                                                                                                                                                                                                                                                                                                                                                                                                                                                                                                                                                                                                                                                                                                                                                                                                                                                                                                                                                                                                                                                                                                                                                                                                                                                                                                                                                                                                                                                                                                                                                                                                                                                                                                                     | ICD-10 Diagnosis |
| Heart failure                       | I09.9, I11.0, I13.0, I13.2, I25.5, I42.0, I42.5-I42.9, I43.X, I50.X, P29.0                                                                                                                                                                                                                                                                                                                                                                                                                                                                                                                                                                                                                                                                                                                                                                                                                                                                                                                                                                                                                                                                                                                                                                                                                                                                                                                                                                                                                                                                                                                                                                                                                                                                                                                                                                                                                                                                                                                                                                                                                                                                                                                                                                                                                                                                              | ICD-10 Diagnosis |
| Acute coronary syndrome             | I200, I2109, I2111, I2119, I2129, I213, I214, I240                                                                                                                                                                                                                                                                                                                                                                                                                                                                                                                                                                                                                                                                                                                                                                                                                                                                                                                                                                                                                                                                                                                                                                                                                                                                                                                                                                                                                                                                                                                                                                                                                                                                                                                                                                                                                                                                                                                                                                                                                                                                                                                                                                                                                                                                                                      | ICD-10 Diagnosis |
| Coronary artery bypass grafting     | 566, 567, 33510, 33511, 33512, 33513, 33514, 33516, 33517, 33518, 33519, 33520, 33521, 33522, 33523, 33525, 33528, 33530, 33533, 33534, 33535, 33536, 35600, 4110F, 75762, 75764, 75766, 75767, 93551, C9604, C9605, G8158, G8159, G8160, G8161, G8162, G8163, G8164, G8165, G8166, G8167, G8170, G8171, G8172, G8497, G8544, G8573, G8574, I2570, I25700, I25701, I25708, I25709, I2571, I25710, I25711, I25718, I25719, I2572, I25720, I25721, I25728, I25729, I2573, I25730, I25731, I25738, I25739, I2579, I25790, I25791, I25798, I25799, I25810, T82211, T82211A, T82211D, T82211S, T82212, T82212A, T82212D, T82212S, T82213, T82213A, T82213D, T82213S, T82218, T82218A, T82218D, T82218S, Z951, 0210093, 0210098, 0210099, 021009C, 021009F, 021009W, 02100A3, 02100A8, 02100A9, 02100AC, 02100AF, 02100AW, 02100J3, 02100J8, 02100J9, 02100JC, 02100JF, 02100JW, 02100K3, 02100K8, 02100K9, 02100KC, 02100KF, 02100KW, 02100Z3, 02100Z8, 02100Z9, 02100ZC, 02100ZF, 0210344, 02103D4, 0210444, 0210493, 0210499, 0210499, 021049F, 021049W, 02104A3, 02104A8, 02104A9, 02104AC, 02104AF, 02104AW, 02104D4, 02104J3, 02104J8, 02104J9, 02104JC, 02104JF, 02104JW, 02104K3, 02104K8, 02104K9, 02104KC, 02104KF, 02104KW, 02104Z3, 02104Z8, 02104Z9, 02104ZC, 02104ZF, 0211093, 0211098, 0211099, 021109C, 021109F, 021109W, 02110A3, 02110A8, 02110A9, 02110AC, 02110AF, 02110AW, 02110J3, 02110J8, 02110J9, 02110JC, 02110JF, 02110JW, 02110K3, 02110K8, 02110K9, 02110KC, 02110KF, 02110KW, 02110Z3, 02110Z8, 02110Z9, 02110ZC, 02110ZF, 0211344, 02113D4, 211444, 0211493, 0211498, 0211499, 021149C, 021149F, 021149W, 02114A3, 02114A8, 02114A9, 02114AC, 02114AF, 02114AW, 02114D4, 02114J3, 02114J8, 02114J9, 02114JC, 02114JF, 02114JW, 02114K3, 02114K8, 02114K9, 02114KC, 02114KF, 02114KW, 02114Z3, 02114Z8, 02114Z9, 02114ZC, 02114ZF, 0212093, 0212098, 0212099, 021209C, 021209F, 021209W, 02120A3, 02120A8, 02120A9, 02120AC, 02120AF, 02120AW, 02120J3, 02120J8, 02120J9, 02120JC, 02120JF, 02120JW, 02120K3, 02120K8, 02120K9, 02120KC, 02120KF, 02120KW, 02120Z3, 02120Z8, 02120Z9, 02120ZC, 02120ZF, 0212344, 02123D4, 0212444, 0212493, 0212498, 0212499, 021249C, 021249F, 021249W, 02124A3, 02124A8, 02124A9, 02124AC, 02124AF, 02124AW, 02124D4, 02124J3, 02124J8, 02124J9, 02124JC, 02124JF, 02124JW, 02124K3, 02124K8, | CPT-4 Procedure  |

|                                    |                                                                                                                                                                                                                                                                                                                                                                                                                                                                                                                                                                                                                                                                                                                                                                                                                                                                                                                                                                                                                                                          |                  |
|------------------------------------|----------------------------------------------------------------------------------------------------------------------------------------------------------------------------------------------------------------------------------------------------------------------------------------------------------------------------------------------------------------------------------------------------------------------------------------------------------------------------------------------------------------------------------------------------------------------------------------------------------------------------------------------------------------------------------------------------------------------------------------------------------------------------------------------------------------------------------------------------------------------------------------------------------------------------------------------------------------------------------------------------------------------------------------------------------|------------------|
|                                    | 02124K9, 02124KC, 02124KF, 02124KW, 02124Z3, 02124Z8, 02124Z9, 02124ZC, 02124ZF, 0213093, 0213098, 0213099, 021309C, 021309F, 021309W, 02130A3, 02130A8, 02130A9, 02130AC, 02130AF, 02130AW, 02130J3, 02130J8, 02130J9, 02130JC, 02130JF, 02130JW, 02130K3, 02130K8, 02130K9, 02130KC, 02130KF, 02130KW, 02130Z3, 02130Z8, 02130Z9, 02130ZC, 02130ZF, 213344, 02133D4, 0213444, 0213493, 0213498, 0213499, 021349C, 021349F, 021349W, 02134A3, 02134A8, 02134A9, 02134AC, 02134AF, 02134AW, 02134D4, 02134J3, 02134J8, 02134J9, 02134JC, 02134JF, 02134JW, 02134K3, 02134K8, 02134K9, 02134KC, 02134KF, 02134KW, 02134Z3, 02134Z8, 02134Z9, 02134ZC, 02134ZF, 0210498, B2020ZZ, B2021ZZ, B202YZZ, B2030ZZ, B2031ZZ, B203YZZ, B212010, B2120ZZ, B212110, B2121ZZ, B212Y10, B212YZZ, B213010, B2130ZZ, B213110, B2131ZZ, B213Y10, B213YZZ, B22300Z, B2230ZZ, B22310Z, B2231ZZ, B223Y0Z, B223YZZ, B223Z2Z, B223ZZZ, B233Y0Z, B233YZZ, B233ZZZ                                                                                                               |                  |
| Percutaneous coronary intervention | 92920, 92921, 92924, 92925, 92928, 92929, 92933, 92934, 92937, 92938, 92941, 92943, 92944, 02700D6, 02700DZ, 02700T6, 02700TZ, 02700Z6, 02700ZZ, 02703D6, 02703DZ, 02703T6, 02703TZ, 02703Z6, 02703ZZ, 02704D6, 02704DZ, 02704T6, 02704TZ, 02704Z6, 02704ZZ, 02710D6, 02710DZ, 02710T6, 02710TZ, 02710Z6, 02710ZZ, 02713D6, 02713DZ, 02713T6, 02713TZ, 02713Z6, 02713ZZ, 02714D6, 02714DZ, 02714T6, 02714TZ, 02714Z6, 02714ZZ, 02720D6, 02720DZ, 02720T6, 02720TZ, 02720Z6, 02720ZZ, 02723D6, 02723DZ, 02723T6, 02723TZ, 02723Z6, 02723ZZ, 02724D6, 02724DZ, 02724T6, 02724TZ, 02724Z6, 02724ZZ, 02730D6, 02730DZ, 02730T6, 02730TZ, 02730Z6, 02730ZZ, 02733D6, 02733DZ, 02733T6, 02733TZ, 02733Z6, 02733ZZ, 02734D6, 02734DZ, 02734T6, 02734TZ, 02734Z6, 02734ZZ, C9600, C9601, C9602, C9603, C9604, C9605, C9606, C9607, C9608, 0270046, 027004Z, 0270346, 027034Z, 0270446, 027044Z, 0271046, 027104Z, 0271346, 027134Z, 0271446, 027144Z, 0272046, 027204Z, 0272346, 027234Z, 0272446, 027244Z, 0273046, 027304Z, 0273346, 027334Z, 0273446, 027344Z | CPT-4 Procedure  |
| Major adverse limb event           | 00.55, 17.56, 39.50, or 39.90, 39.25, 39.26, 39.39, 84.13, 84.14, 84.15, 84.16, 84.17                                                                                                                                                                                                                                                                                                                                                                                                                                                                                                                                                                                                                                                                                                                                                                                                                                                                                                                                                                    | ICD-9 Procedure† |

\*Code position and associated healthcare encounter for endpoints-of-interest are described further in the main publication text.

†Any ICD-9 codes were converted to ICD-10 using the Centers for Medicare and Medicaid Services (CMS) General Equivalence Mappings (GEMs) files available at: <https://www.cms.gov/Medicare/Coding/ICD10/2018-ICD-10-CM-and-GEMs.html> (Last accessed on November 21, 2019).
